# Supplementary material for: Impacts of Reducing Protein Content in Milk Replacer on Growth Performance and Health of Young Calves
Source: MDPI journal article supplement (doi:10.3390/ani12141756), 2022-07-08
Supplement: s1 [file s1]

## Supplementary material

**Table S1.** Vitamin concentration of vitamin B complex (Vitamin-B-Komplex pro inj., Serumwerk Bernburg AG)

| Vitamin                         | Concentration (mg / mL) |
|---------------------------------|-------------------------|
| Thiamine chloride hydrochloride | 8.0                     |
| Cyanocobalamine                 | 0.02                    |
| Nicotinamide                    | 20.0                    |
| Pyridoxine hydrochloride        | 0.8                     |
| Riboflavin phosphate sodium     | 0.42                    |
| Dexpanthenol                    | 0.84                    |

**Table S2.** Declared chemical composition and feed additives of MR22 and MR19.

| Item                    | Unit                | MR22    | MR19    |
|-------------------------|---------------------|---------|---------|
| Crude ash               | %                   | 7.50    | 6.80    |
| Crude Protein           | %                   | 22.0    | 19.0    |
| Lysine                  | %                   | 1.80    | 1.65    |
| Ether extract           | %                   | 18.0    | 18.0    |
| Crude fibre             | %                   | 0.10    | 0.10    |
| Calcium                 | %                   | 0.80    | 0.75    |
| Phosphorus              | %                   | 0.75    | 0.65    |
| Magnesium               | %                   | 0.20    | 0.20    |
| Sodium                  | %                   | 0.70    | 0.60    |
| Vitamin A               | I.E./kg             | 100,000 | 100,000 |
| Vitamin D <sub>3</sub>  | I.E./kg             | 10,000  | 10,000  |
| Vitamin E               | mg/kg               | 200     | 200     |
| Vitamin K               | mg/kg               | 5.00    | 5.00    |
| Vitamin C               | mg/kg               | 450     | 450     |
| Vitamin B <sub>1</sub>  | mg/kg               | 15.0    | 15.0    |
| Vitamin B <sub>2</sub>  | mg/kg               | 24.0    | 24.0    |
| Vitamin B <sub>6</sub>  | mg/kg               | 6.60    | 6.60    |
| Vitamin B <sub>12</sub> | mg/kg               | 66.0    | 66.0    |
| Niacin                  | mg/kg               | 100     | 100     |
| Pantothenic acid        | mg/kg               | 50      | 50      |
| Choline chloride        | mg/kg               | 313     | 313     |
| Iron                    | mg/kg               | 90.0    | 90.0    |
| Copper                  | mg/kg               | 9.00    | 9.00    |
| Zinc                    | mg/kg               | 37.0    | 37.0    |
| Manganese               | mg/kg               | 28.0    | 28.0    |
| Iodine                  | mg/kg               | 0.40    | 0.40    |
| Selenium                | mg/kg               | 0.20    | 0.20    |
| Pucoferm <sup>1</sup>   | 10 <sup>9</sup> CFU | 1.00    | 1.00    |

<sup>1</sup> Enterococcus faecium M74 (NCIMB 11181, 4b1708), Pulte GmbH & Co. KG, Prien, Germany

**Table S3.** Colostrum and whole milk intake (mean  $\pm$  SD) of groups MR22 and MR19 during the first week of life, given in L/calf/d.

| Day of life | MR22          | MR19          |
|-------------|---------------|---------------|
| Birth       | 3.9 $\pm$ 1.7 | 3.5 $\pm$ 2.0 |
| 1           | 4.4 $\pm$ 1.4 | 4.9 $\pm$ 1.7 |
| 2           | 5.5 $\pm$ 1.4 | 6.5 $\pm$ 1.4 |
| 3           | 7.1 $\pm$ 1.0 | 7.2 $\pm$ 1.3 |
| 4           | 8.3 $\pm$ 1.2 | 8.0 $\pm$ 1.3 |
| 5           | 8.5 $\pm$ 1.6 | 8.6 $\pm$ 1.1 |
| 6           | 7.9 $\pm$ 3.2 | 7.6 $\pm$ 2.4 |
| 7           | 4.8 $\pm$ 2.6 | 5.2 $\pm$ 2.9 |

**Table S4.** Weekly intake of dry matter (DM, mean  $\pm$  SD) and crude protein (CP, mean  $\pm$  SD) by milk replacer of groups MR22 and MR19 during pre-transition and transition period, given in g/calf/d.

| Trial period   | Age (days) | DM              |                 | CP              |                 |
|----------------|------------|-----------------|-----------------|-----------------|-----------------|
|                |            | MR22            | MR19            | MR22            | MR19            |
| Pre-transition | 9-15       | 1060 $\pm$ 209  | 1042 $\pm$ 239  | 231 $\pm$ 45.5  | 193 $\pm$ 44.2  |
|                | 16-22      | 1388 $\pm$ 205  | 1383 $\pm$ 243  | 303 $\pm$ 44.8  | 256 $\pm$ 45.0  |
|                | 23-29      | 1434 $\pm$ 184  | 1433 $\pm$ 165  | 313 $\pm$ 40.1  | 265 $\pm$ 30.5  |
|                | 30-36      | 1426 $\pm$ 158  | 1408 $\pm$ 209  | 311 $\pm$ 34.4  | 261 $\pm$ 38.7  |
|                | 37-42      | 1447 $\pm$ 148  | 1397 $\pm$ 196  | 315 $\pm$ 32.3  | 259 $\pm$ 36.3  |
| Transition     | 43-49      | 1037 $\pm$ 46.7 | 1035 $\pm$ 60.7 | 226 $\pm$ 10.2  | 192 $\pm$ 11.2  |
|                | 50-56      | 772 $\pm$ 24.8  | 775 $\pm$ 27.7  | 168 $\pm$ 5.40  | 143 $\pm$ 5.13  |
|                | 57-63      | 470 $\pm$ 7.46  | 462 $\pm$ 19.5  | 102 $\pm$ 1.62  | 85.4 $\pm$ 3.61 |
|                | 64-70      | 149 $\pm$ 18.6  | 140 $\pm$ 13.2  | 32.6 $\pm$ 4.05 | 25.9 $\pm$ 2.44 |
